# Supplementary material for: Elastic and wearable ring-type supercapacitors
Source: Royal Society of Chemistry journal article supplement (doi:10.1039/c5ta10461k), 2016-01-01
Supplement: c5ta10461k1.pdf [file c5ta10461k1.pdf]

### Supporting Information

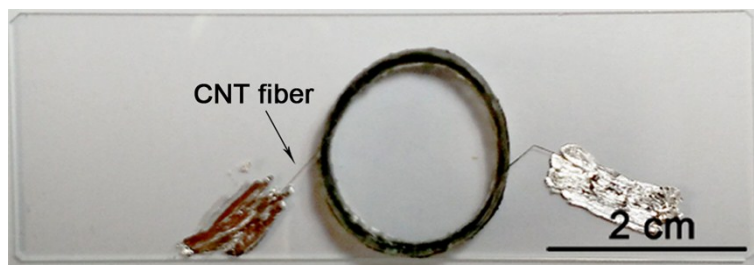

**Figure S1.** Photograph of a ring-type supercapacitor (RTSC). The aligned carbon nanotube (CNT) fiber was prepared by scrolling ten layers of CNT sheets with a width of 10 mm.

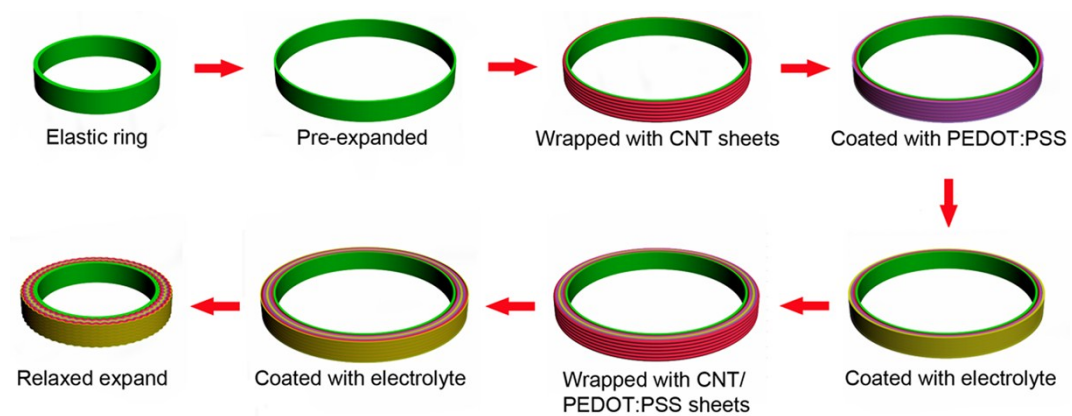

**Figure S2.** Schematic illustration to the fabrication of the RTSC.

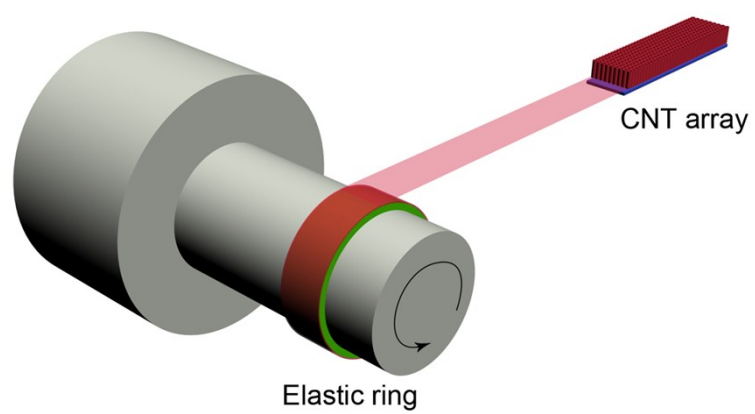

**Figure S3.** Schematic illustration to the preparation of the elastic ring electrode.

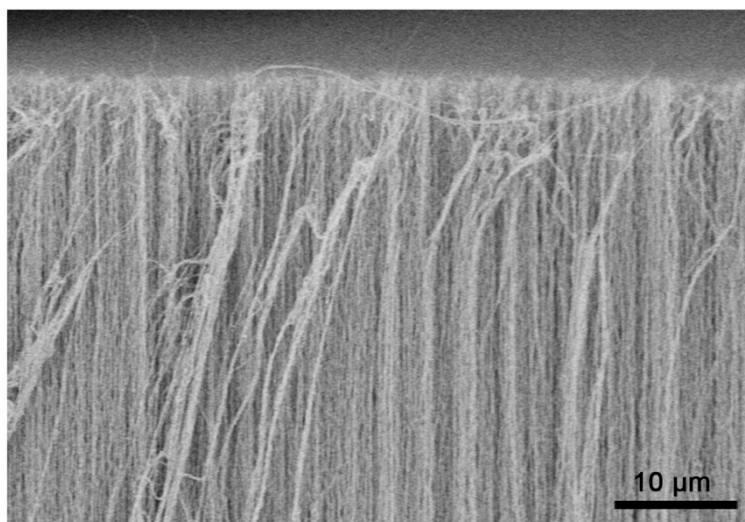

**Figure S4.** Scanning electron microscopy (SEM) image of a spinnable CNT array by side view.

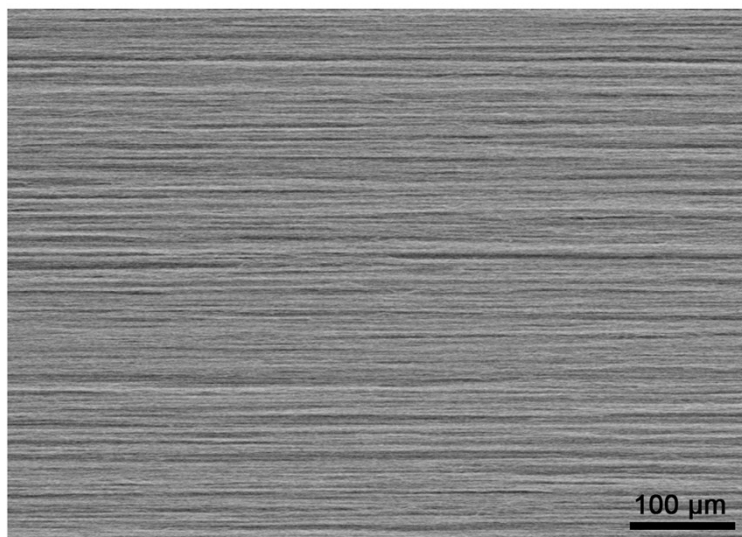

**Figure S5.** SEM image of an aligned CNT sheet on silicon wafer.

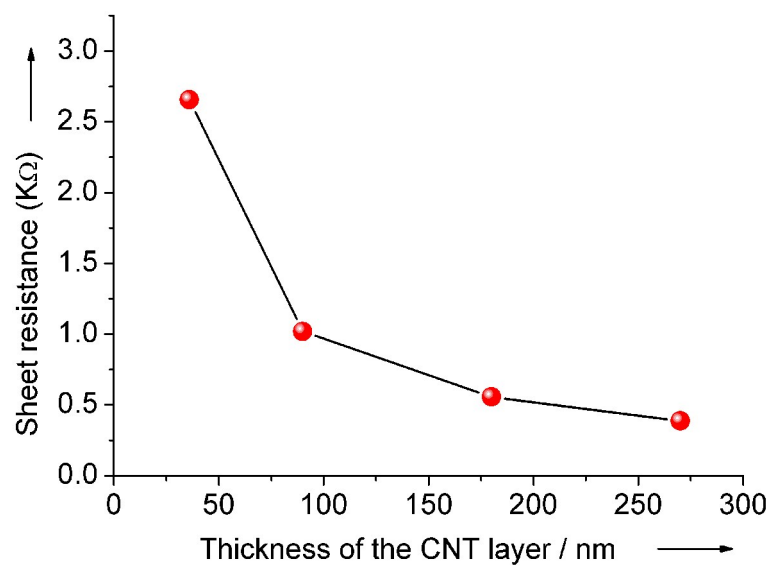

**Figure S6.** Dependence of electrical resistance on the layer number of CNT sheets. The sheets shared the length of 10 mm and width of 2 mm.

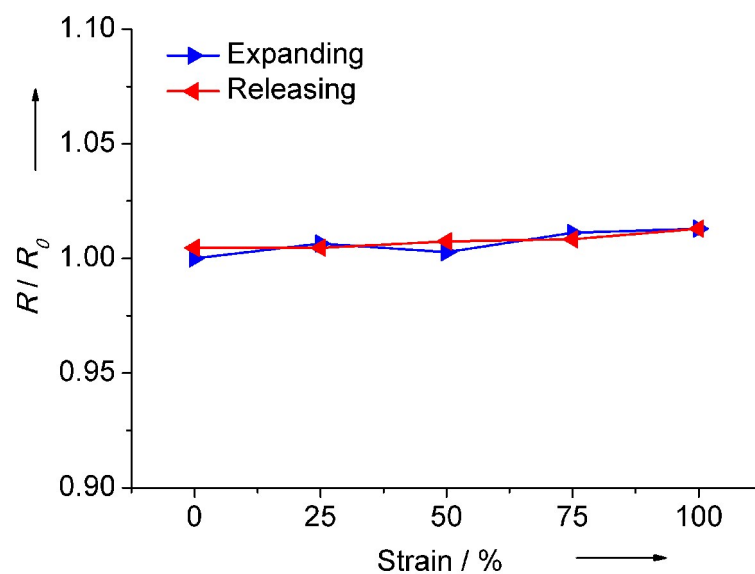

**Figure S7.** Dependence of electrical resistance of CNT sheet on strain. Here  $R_0$  and  $R$  correspond to the electrical resistances before and after deformation, respectively.

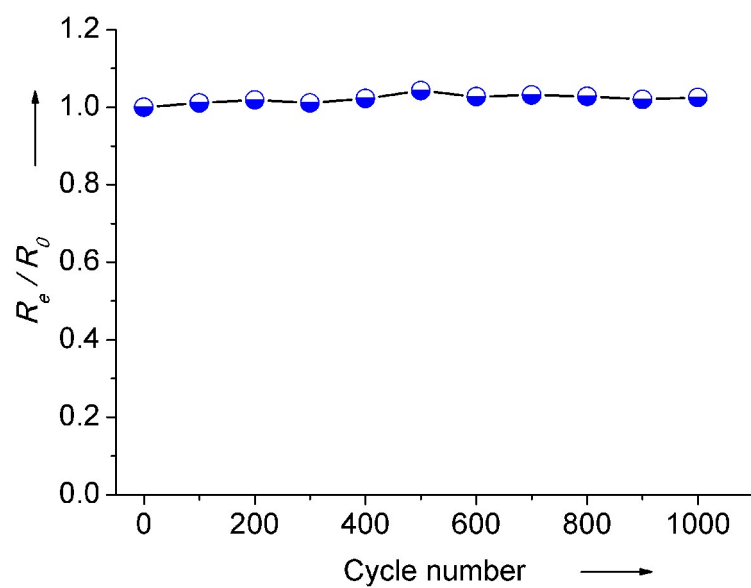

**Figure S8.** Dependence of electrical resistance of CNT sheet on expanding cycle number at a strain of 100%. Here  $R_0$  and  $R_e$  correspond to the electrical resistances before and after expanding, respectively.



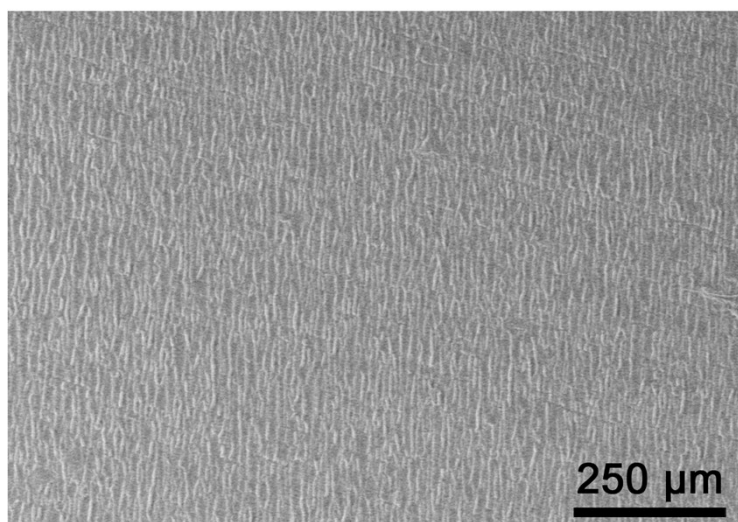

**Figure S9.** SEM image of the CNT sheet after expanding for 1000 cycles at a strain of 100%.

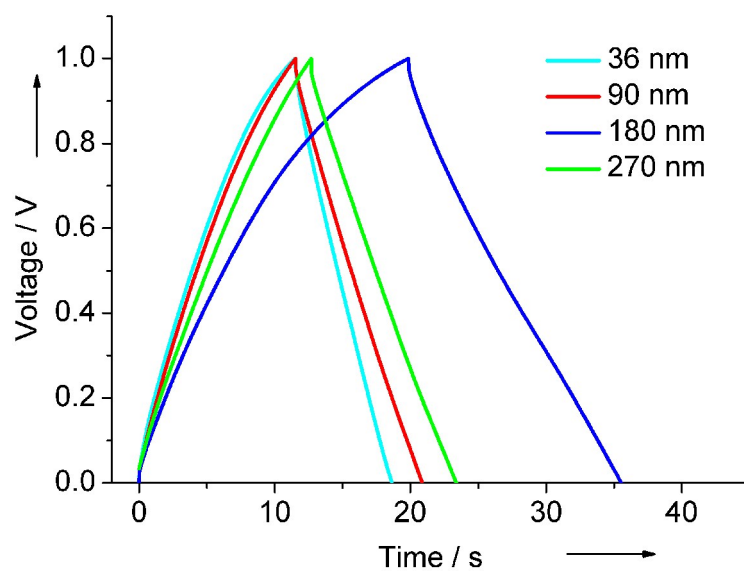

**Figure S10.** Galvanostatic charge-discharge curves of the RTSC fabricated from the CNT sheets with different thicknesses.

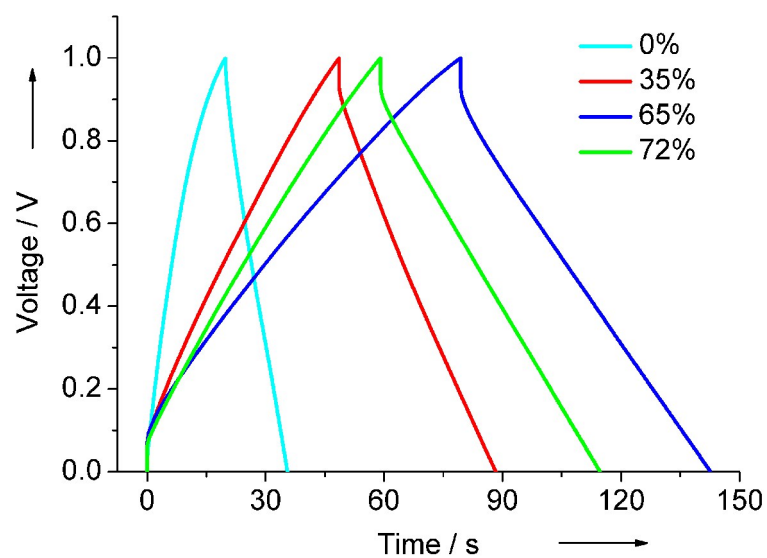

**Figure S11.** Galvanostatic charge-discharge curves of the RTSC fabricated from different weight percentages of PEDOT:PSS.

**Table S1.** Comparison of this RTSC with previous supercapacitors in terms of gravimetric specific capacitance.

| References | Configuration | Electrode materials | C (F g <sup>-1</sup> ) |
|------------|---------------|---------------------|------------------------|
| This study | Ring-type     | CNT/PEDOT:PSS       | 134.8                  |
| 21         | Fiber-shaped  | CNT/PEDOT:PSS       | 122.8                  |
| 23         | Fiber-shaped  | CNT/OMC             | 41.4                   |
| 24         | Fiber-shaped  | CNT/PANI            | 111.6                  |
| 25         | Planar        | CNT/PEDOT:PSS       | 133                    |
| 26         | Planar        | Carbon paper/PEDOT  | 154.5                  |
| 27         | Planar        | CNT                 | 53                     |

CNT: carbon nanotube; PEDOT: poly(3, 4-ethyl-enedioxythiophene); PSS poly(styrene sulfonate); OMC: ordered mesoporous carbon; PANI: polyaniline.

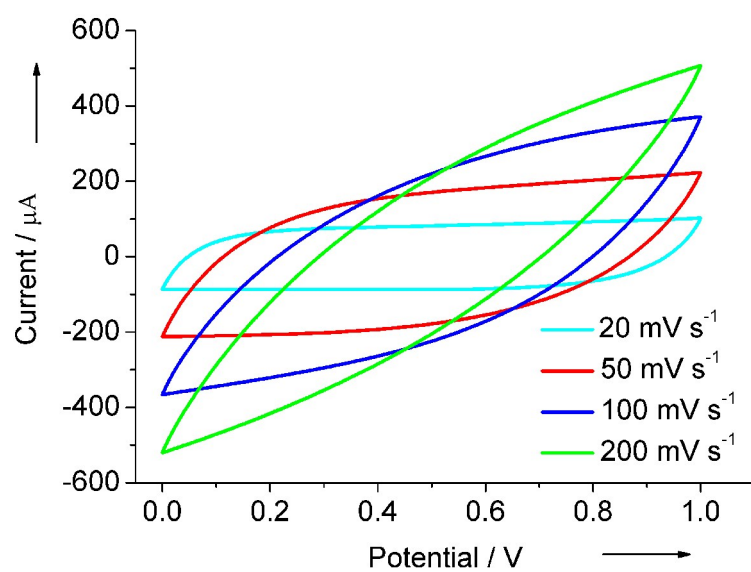

**Figure S12.** Cyclic voltammograms of the RTSC fabricated from PEDOT:PSS with a weight percentage of 65% at increasing scan rates.

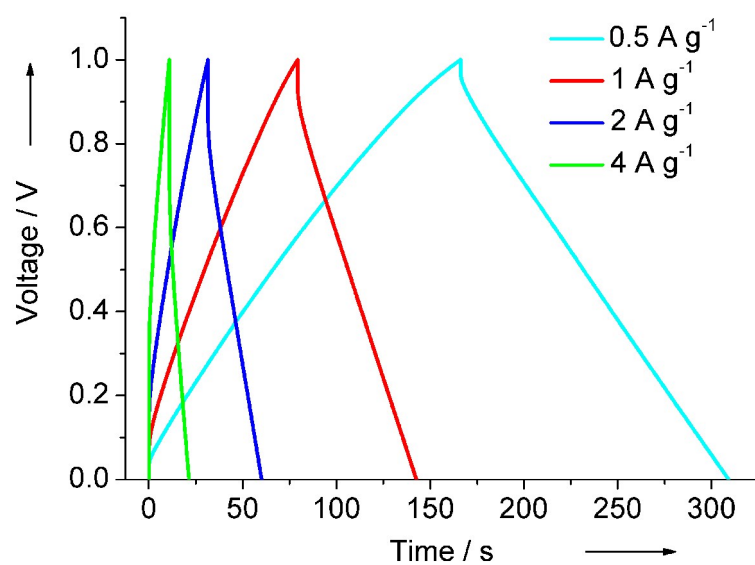

**Figure S13.** Galvanostatic charge-discharge curves of the RTSC fabricated from the PEDOT:PSS with a weight percentage of 65% at increasing current densities.

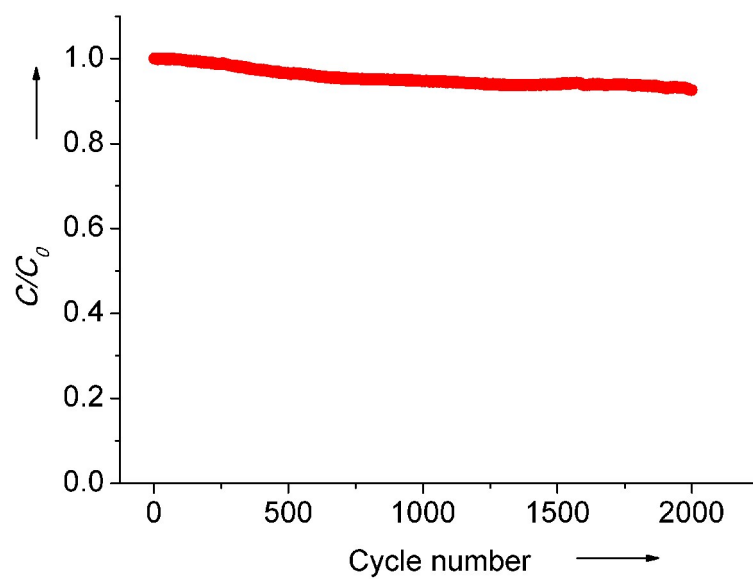

**Figure S14.** Dependence of specific capacitance on cycle number at a current density of  $1 \text{ A g}^{-1}$ . Here  $C_0$  and  $C$  correspond to the specific capacitances at the first and the following cycles, respectively.

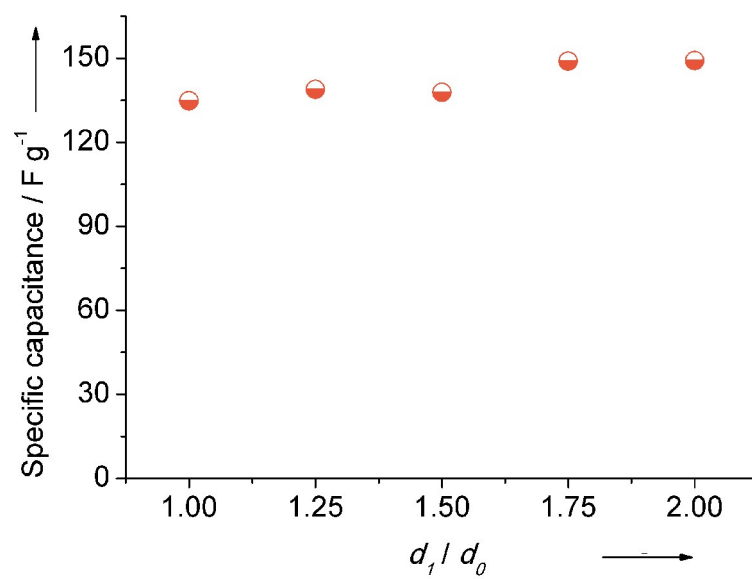

**Figure S15.** Dependence of specific capacitance on expanding strain. Here  $d_1$  and  $d_0$  are defined in Figure 3.



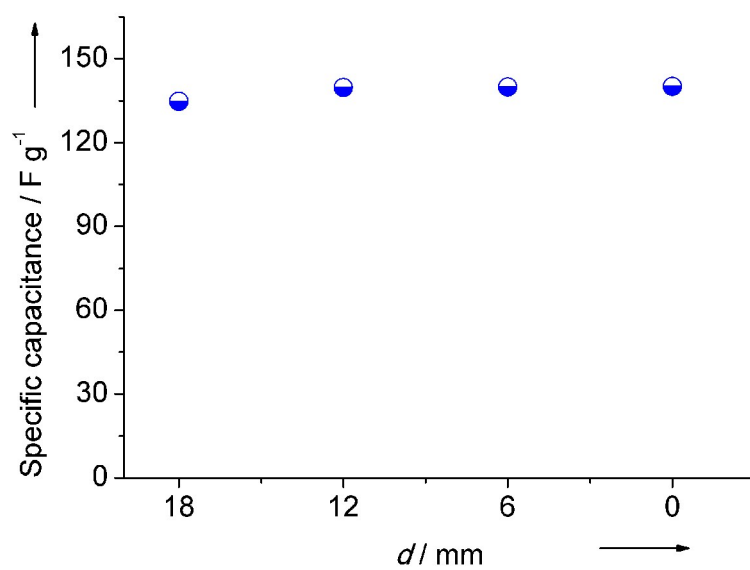

**Figure S16.** Dependence of specific capacitance on pressing strain. Here  $d$  is defined in Figure 3.

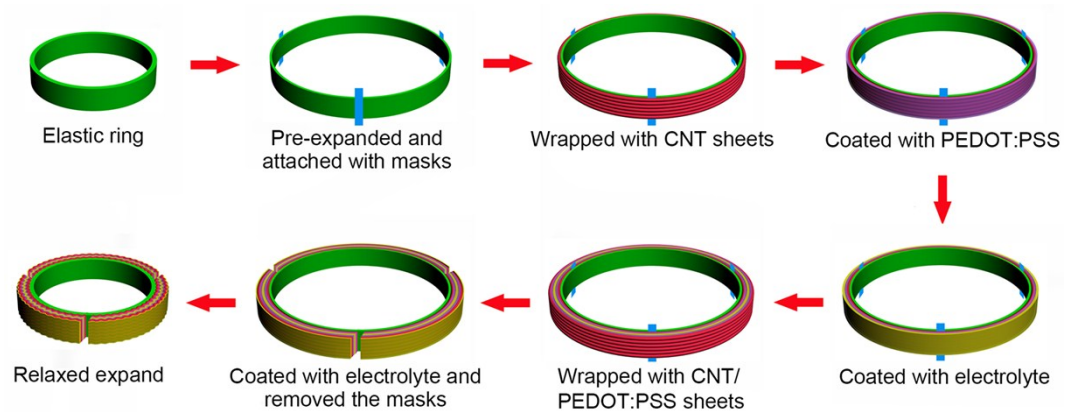

**Figure S17.** Schematic illustration to the fabrication of the RTSC that was composed of three sections being connected in series along the ring.

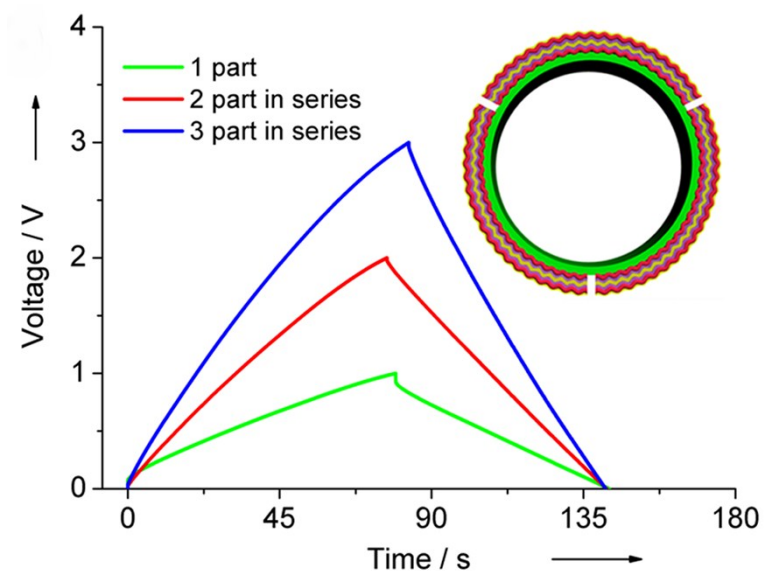

**Figure S18.** Galvanostatic charge-discharge curves of RTSCs composed of one, two and three sections. The two or three sections are connected in series along the ring.
